# Supplementary material for: Glycosylases and AP-cleaving enzymes as a general tool for probe-directed cleavage of ssDNA targets
Source: PubMed Central journal article supplement — Nucleic Acids Res. 2010 Jan 15;38(7):e99. doi: 10.1093/nar/gkp1238 (PMC2853139; doi:10.1093/nar/gkp1238), 2010-01-15
Supplement: gkp1238_1.pdf [file gkp1238_1.pdf]

## Glycosylases and AP-cleaving enzymes as a general tool for probe-directed cleavage of ssDNA targets

W. Mathias Howell\*, Ida Grundberg, Marta Faryna, Ulf Landegren and Mats Nilsson

### Supplementary figure 1

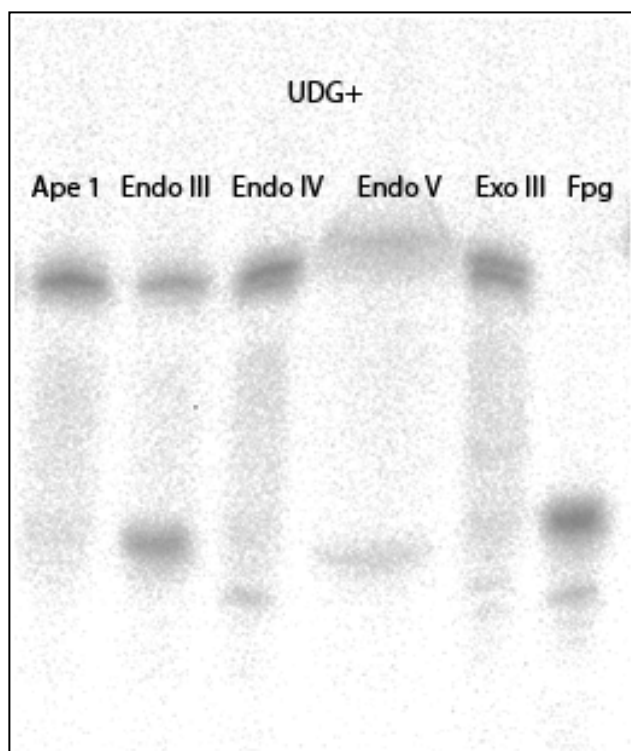

**Supplementary figure 1.** Cleavage of ssDNA substrates by UDG and AP-active enzymes. The gel image depicts single-stranded DNA molecules (containing a U) that were first treated with UDG, then split into tubes containing one of the AP-cleaving enzymes. Endo III showed some activity on ssDNA substrates, however Fpg showed near complete cleavage.
